# Supplementary material for: Asymmetric Preorganization of Inverted Pair Residues in the Sodium-Calcium Exchanger
Source: PubMed Central journal article supplement (PMC4753433; doi:10.1038/srep20753), 2016-02-15

Supporting information for

**Asymmetric Preorganization of Inverted Pair Residues in the  
Sodium-Calcium Exchanger**

**Moshe Giladi<sup>a,1</sup>, Lior Almagor<sup>a,1</sup>, Liat van Dijk<sup>a</sup>, Reuben Hiller<sup>a</sup>, Petr Man<sup>b</sup>,  
Eric Forest<sup>c,d,e\*</sup> and Daniel Khananshvil<sup>a\*</sup>**

<sup>a</sup>Department of Physiology and Pharmacology, Sackler School of Medicine, Tel-Aviv University, Ramat-Aviv 69978, Israel.

<sup>b</sup>Institute of Microbiology, Academy of Sciences of the Czech Republic, Prague, Czech Republic.

<sup>c</sup>Univ. Grenoble Alpes, IBS, F-38044 Grenoble, France

<sup>d</sup>CNRS, IBS, F-38044 Grenoble, France

<sup>e</sup>CEA, IBS, F-38044 Grenoble, France

<sup>1</sup> **These authors contributed equally**

**\*Corresponding authors:**

\*Dr. Eric Forest, Institut de Biologie Structurale,  
EPN Campus, 71 avenue des Martyrs  
CS 10090, 38044 Grenoble Cedex 9, France  
E-mail: [eric.forest@ibs.fr](mailto:eric.forest@ibs.fr)

\*Prof. Daniel Khananshvil  
Department of Physiology and Pharmacology  
Sackler School of Medicine, Tel-Aviv University  
Ramat-Aviv, Tel-Aviv 69978, Israel  
Tel: 972-3-640-9961; Fax: 972-3-640-9113  
E-mail: [dhanan@post.tau.ac.il](mailto:dhanan@post.tau.ac.il)

**This file includes:**

Figure S1 to S4;

Table S1

**FIGURE S1.  $^{45}\text{Ca}^{2+}$ -flux assays of  $\text{Na}^+/\text{Ca}^{2+}$  and  $\text{Ca}^{2+}/\text{Ca}^{2+}$  exchange reactions. (A)**

The time course of  $\text{Na}^+$ -dependent  $^{45}\text{Ca}^{2+}$ -uptake was measured in vesicles containing either overexpressed WT or mutated NCX\_Mj. The  $\text{Na}^+$ -loaded (160 mM) vesicles were rapidly diluted (20-50-fold) in the assay medium containing 20 mM Mops/Tris, pH 6.5, 100 mM KCl, and 200  $\mu\text{M}$   $^{45}\text{CaCl}_2$  at 35°C and the  $\text{Ca}^{2+}$ -uptake was stopped at the indicated times by injecting a cold EGTA-containing buffer. Quenched solutions were filtered and the radioactivity retained on the filters was assayed using a scintillation solution. **(B)** The initial rates ( $t = 5$  s) of the  $\text{Na}^+/\text{Ca}^{2+}$  and  $\text{Ca}^{2+}/\text{Ca}^{2+}$  exchange reactions were measured by diluting the  $\text{Na}^+$ -loaded (160 mM) or  $\text{Ca}^{2+}$ -loaded (250  $\mu\text{M}$ ) vesicles in an assay medium containing 20-2000  $\mu\text{M}$   $^{45}\text{CaCl}_2$ . The exchange reactions were stopped and  $^{45}\text{Ca}^{2+}$ -uptake was measured as described above. **(C)** The equilibrium binding of  $^{45}\text{Ca}^{2+}$  to purified WT NCX\_Mj was measured by using the protein ultrafiltration method<sup>1,2</sup>. Briefly, an assay medium containing 30-50  $\mu\text{M}$  protein with 100 mM KCl and 10 mM Tris-HCl at pH 7.2 was placed in the upper chamber of an Ultracel-3k concentrator and the assay was performed as previously outlined<sup>1,2</sup>. The concentrations of residual  $[\text{Ca}^{2+}]_{\text{res}}$  in the decalcified assay buffers were measured by using the Fluo-3 assay<sup>2</sup>. The  $^{45}\text{Ca}^{2+}$ -binding titration curves were fit using GraFit software v7.1 (Erithacus Software, Ltd). The  $K_d$  value was derived by fitting the experimental points obtained by  $^{45}\text{Ca}^{2+}$ -titration curves.

**FIGURE S2. Quantitative assay of the intrinsic equilibrium ( $K_{\text{int}}$ ) of bidirectional  $\text{Ca}^{2+}$  movements** – According to the ping-pong mechanism, describing the unidirectional  $\text{Na}^+/\text{Ca}^{2+}$  exchange cycle or the bidirectional  $\text{Ca}^{2+}/\text{Ca}^{2+}$  exchange (Figure 1E), the "apparent binding affinity" of  $\text{Ca}^{2+}$  ( $K''_m$  or  $K'_m$ ) at opposite sides of the membrane can be

represented as a function of the intrinsic binding constant ( $K''_{Ca}$ ,  $K'_{Ca}$ ) and of the ion-translocation rate constants ( $l', l'', k', k''$ ) (Table S1). According to this formalism, the  $K'_m/K''_m$  ratio of the  $Ca^{2+}/Ca^{2+}$  exchange represents the intrinsic equilibrium ( $K_{int}$ ) for bidirectional  $Ca^{2+}$  movements (Equation 1), which is related to  $Ca^{2+}$  binding at opposite sides of the membrane<sup>4,5</sup>.

$$K_{int} = \frac{K'_m(Ca/Ca)}{K''_m(Ca/Ca)} = \frac{K'_{Ca}}{K''_{Ca}} \frac{l''}{l'} \quad (\text{Equation 1})$$

According to this formalism, the experimentally measured values of cytosolic  $K'_m = 28.2 \pm 3.5 \mu\text{M}$  and extracellular  $K''_m = 183.9 \pm 27.7 \mu\text{M}$  of the  $Ca^{2+}/Ca^{2+}$  exchange (Figure 3B) result in a  $K_{int}$  value of  $0.15 \pm 0.05$  ( $n=5$ ), thereby revealing an intrinsic asymmetry of bidirectional  $Ca^{2+}$  movements favoring the extracellular access. By assuming that  $Ca^{2+}$  binding site of NCX\_Mj ( $S_{Ca}$ ) has a comparable intrinsic affinity for  $Ca^{2+}$  binding ( $K'_{Ca} \approx K''_{Ca}$ ) at the cytosolic and extracellular sides, the  $l'$  values may be at least five times faster than  $l''$ . The observed values of  $V'_{max}$  and  $V''_{max}$  for  $Ca^{2+}/Ca^{2+}$  exchange are comparable (Figure S3) as expected for the ping-pong mechanism (Figure 1E).

**FIGURE S3. Mapping of NCX under conditions compatible with HDX sequence coverage of NCX\_Mj.** The transmembrane helices are shown above the sequence. Peptic peptides are displayed as black bars below the sequence. NCX\_Mj was digested at a low pH and at a low temperature and the peptides were identified using tandem MS (40). The digestion conditions were optimized to obtain the highest sequence coverage with small or mid-size peptides (below around 30 amino acids). Pepsin, either in solution or immobilized, was tried in the presence or absence of denaturing agents. The best sequence coverage was obtained using pepsin in solution without any denaturing agent

(see Methods). The regions 41-59 (TM2) and 195-264 (from TM7 to the beginning of TM9) were covered by three and eight peptides, respectively. A small portion of TM9 was also found (peptide 259-264). Furthermore, four couples of overlapping peptides (possessing a common extremity) enabled us to locally increase the resolution, giving information on small segments (2-7 amino acids). Interestingly, the interface between the two inverted-topology repeats was covered, including the four putative ion-binding sites.

**FIGURE S4: Deuterium uptake plots for peptides which are not presented in Figure 2C.**

Data are presented as the mean  $\pm$  SD (n=3).

**TABLE S1. Kinetic parameters of Na<sup>+</sup>/Ca<sup>2+</sup> and Ca<sup>2+</sup>/Ca<sup>2+</sup> exchange reactions.**

| Reaction                                                                                                   | Observed $K_m$                         | Observed $V_{max}$                          |
|------------------------------------------------------------------------------------------------------------|----------------------------------------|---------------------------------------------|
| Ca <sup>2+</sup> /Ca <sup>2+</sup> exchange at varying [Ca] <sup>'</sup> and saturating [Ca] <sup>''</sup> | $K'_m = \frac{K'_{Ca} l''}{l' + l''}$  | $V'_{max} = \frac{l' l''}{l' + l''} [E]_t$  |
| Ca <sup>2+</sup> /Ca <sup>2+</sup> exchange at varying [Ca] <sup>''</sup> and saturating [Ca] <sup>'</sup> | $K''_m = \frac{K''_{Ca} l'}{l' + l''}$ | $V''_{max} = \frac{l' l''}{l' + l''} [E]_t$ |
| Na <sup>+</sup> /Ca <sup>2+</sup> exchange at varying [Ca] <sup>'</sup> and saturating [Na] <sup>''</sup>  | $K'_m = \frac{K'_{Ca} k''}{l' + k''}$  | $V'_{max} = \frac{l' k''}{l' + k''} [E]_t$  |
| Na <sup>+</sup> /Ca <sup>2+</sup> exchange at varying [Ca] <sup>''</sup> and saturating [Na] <sup>'</sup>  | $K''_m = \frac{K''_{Ca} k'}{k' + l''}$ | $V''_{max} = \frac{k' l''}{k' + l''} [E]_t$ |

The initial rates of Na<sup>+</sup>/Ca<sup>2+</sup> and Ca<sup>2+</sup>/Ca<sup>2+</sup> exchange reactions were measured by varying the concentrations of extravesicular <sup>45</sup>Ca<sup>2+</sup> (20-2000  $\mu$ M) and using saturating concentrations of intravesicular Ca<sup>2+</sup> (250  $\mu$ M) or Na<sup>+</sup> (160 mM), as described in the legend of Fig. S1 (see also Methods). The  $K_m$  and  $V_{max}$  values of the exchange reactions were derived by fitting the calculated lines to the experimental points and the  $k_{cat}$  values were calculated as  $k_{cat} = V_{max}/[E]_t$ , by normalizing the expression levels of  $[E]_t$  using the GFP assay (see Methods). The

rate constants,  $l'$ ,  $l''$ , and  $k'$  represent the  $\text{Ca}^{2+}$  and  $\text{Na}^+$  movements across the membrane as illustrated in Fig. 1E. The  $K_d$  value represents the observed equilibrium constant for  $\text{Ca}^{2+}$  binding in the isolated preparation of NCX\_Mj. The initial rates of  $\text{Na}^+/\text{Ca}^{2+}$  and  $\text{Ca}^{2+}/\text{Ca}^{2+}$  exchange reactions were measured by varying the concentrations of extravesicular  $^{45}\text{Ca}^{2+}$  (20-2000  $\mu\text{M}$ ) and using saturating concentrations of intravesicular  $\text{Ca}^{2+}$  (250  $\mu\text{M}$ ) or  $\text{Na}^+$  (160 mM), as described in the legend of Fig. S1 (see also Methods). The  $K_m$  and  $V_{\max}$  values of the exchange reactions were derived by fitting the calculated lines to the experimental points and the  $k_{\text{cat}}$  values were calculated as  $k_{\text{cat}} = V_{\max}/[E]_t$ , by normalizing the expression levels of  $[E]_t$  using the GFP assay (see Methods). The rate constants,  $l'$ ,  $l''$ , and  $k'$  represent the  $\text{Ca}^{2+}$  and  $\text{Na}^+$  movements across the membrane as illustrated in Fig. 1E. The  $K_d$  value represents the observed equilibrium constant for  $\text{Ca}^{2+}$  binding in the isolated preparation of NCX\_Mj.

## REFERENCES

1. Giladi, M., et al.  $\text{Ca}^{2+}$ -driven interdomain switch of NCX: Structural and biochemical studies of the two-domain  $\text{Ca}^{2+}$  sensor. *PLoS One* **7**, e39985 (2012).
2. Boyman, L., Mikhasenko, H., Hiller, R. & Khananshvil D. Kinetic and equilibrium properties of regulatory calcium sensors of NCX1 protein. *J. Biol. Chem.* **284**, 6185-6193 (2009).
3. Almagor, L., et al. Functional asymmetry of bidirectional  $\text{Ca}^{2+}$ -movements in an archaeal sodium-calcium exchanger (NCX\_Mj). *Cell calcium* **56**, 276-284 (2014).
4. Khananshvil, D., Weil-Maslansky, E. & Baazov, D. Kinetics and mechanism: modulation of ion transport in the cardiac sarcolemma sodium-calcium exchanger by protons, monovalent, ions, and temperature. *Ann. N. Y. Acad. Sci.* **779**, 217-235 (1996).

# Figure S1

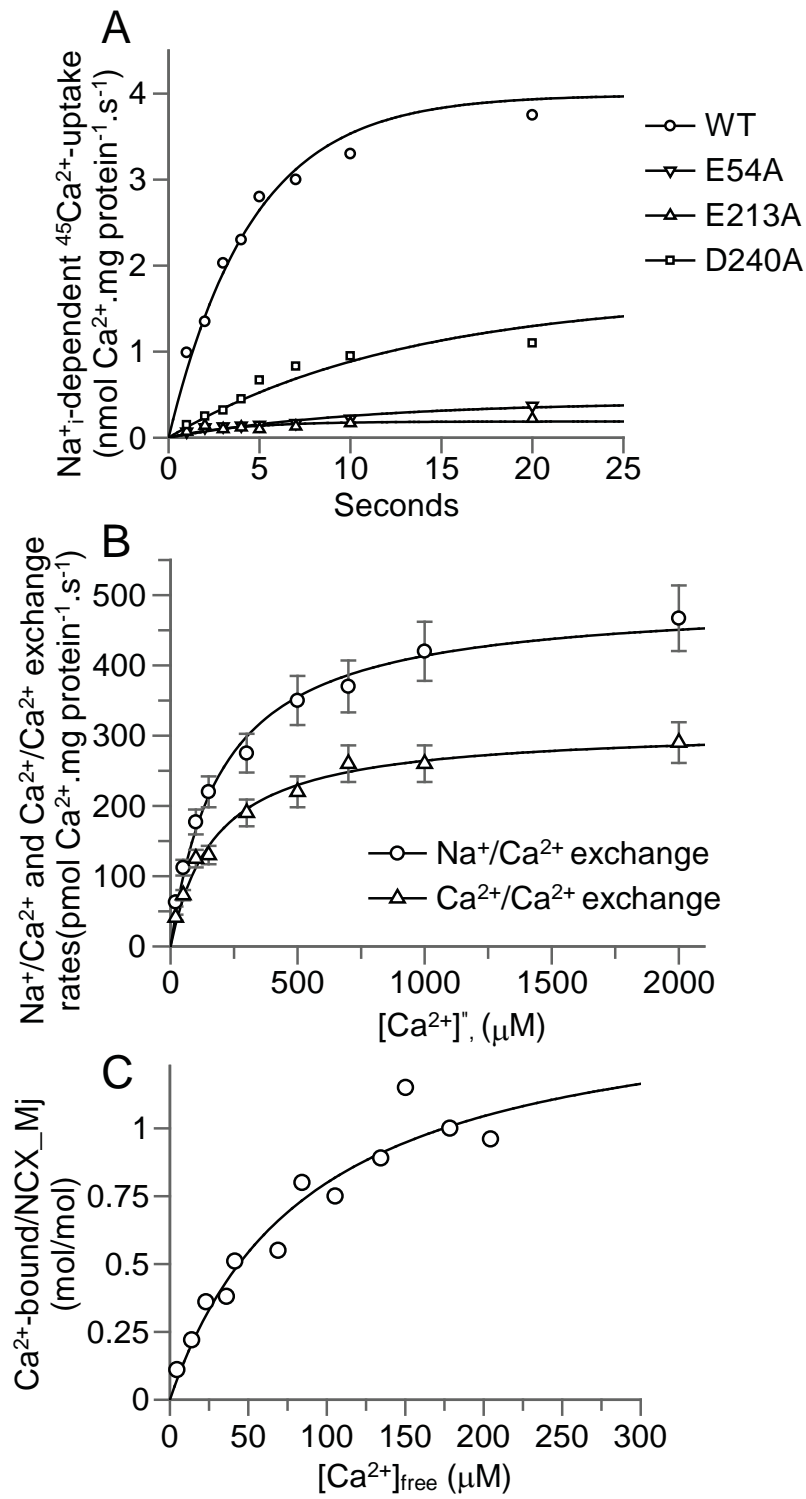

# Figure S2

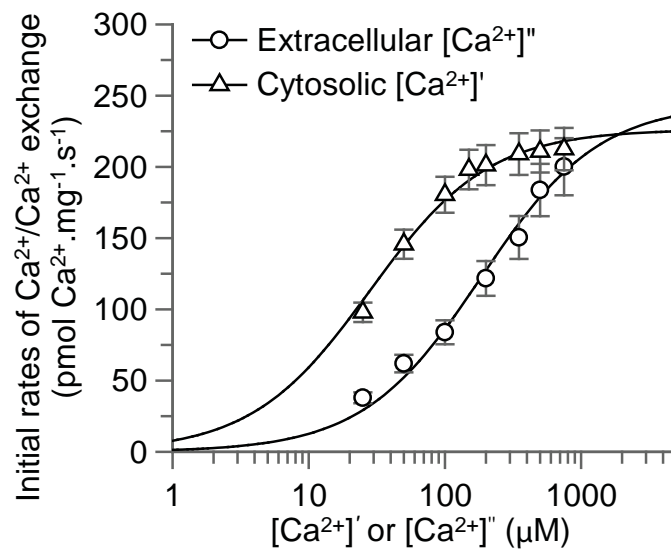

# Figure S3

1 MVILGVGYFL LGLILLYYGS DWFVLGSERI ARHFNVSNFV IGATVMAIGT SLPEILTSAY 60  
TM1 TM2A TM2B TM2C

61 ASYMHAPGIS IGNAIGSCIC NIGLVLGLSA IISPIIVDKN LQKNILVYLL FVIFAAVIGI 120  
TM2C TM3A TM3B TM4

121 DGFSWIDGVV LLILFIIYLR WTVKNGSAEI EENNDKNNPS VVFSLVLLII GLIGVLVGAE 180  
TM5 TM6

181 LFVDGAKKIA LALDISDKVI GFTLVAFGTS LPELMVSLAA AKRNLGGMVL GNVIGSNIAD 240  
TM6 TM7A TM7B TM7C TM8A

241 IGGALAVGSL FMHLPAENVQ MAVLVIMSLL LYLFAKYSKI GRWQGILFLA LYIIAIASLR 300  
TM8B TM9 TM10

301 MGGGSENLYF Q 311



# Figure S4

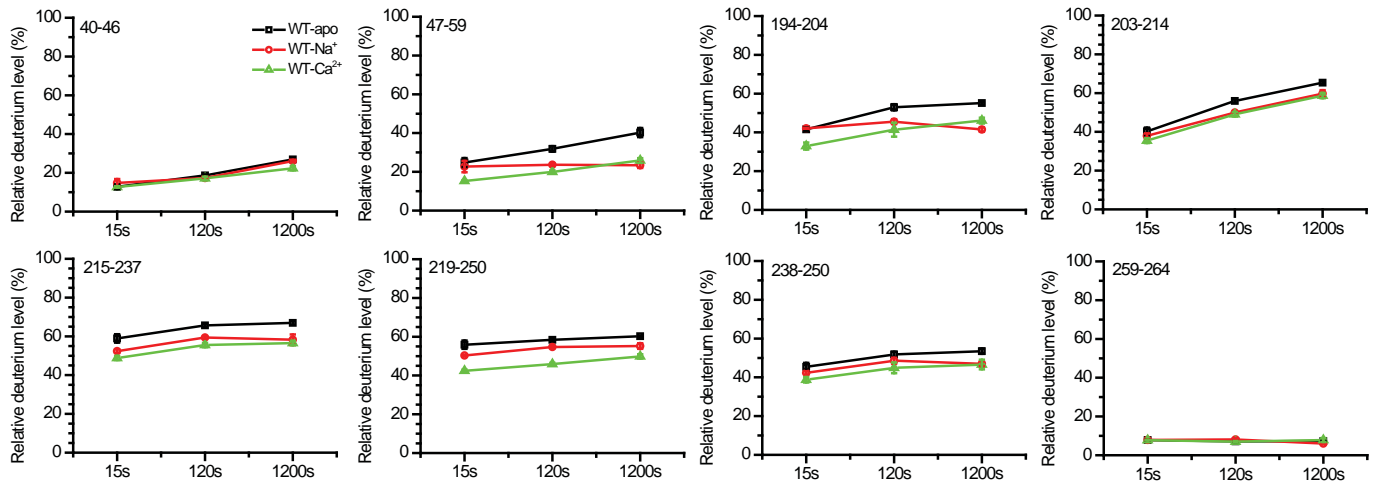

Supplement: srep20753-s1.pdf [file srep20753-s1.pdf]
